# Supplementary material
Source: Springer Nature journal article supplement (https://www.springermedizin.de/resource/supplementary/12879_2012_2513_MOESM3_ESM.pdf/9444750)

■ V monovalent (2nd dose) ■ MMR-V (2nd dose)

Varicella vaccinations / month and practice

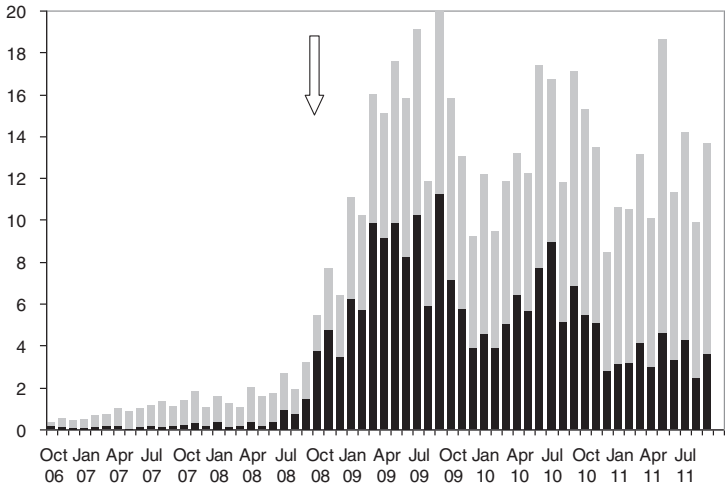

Supplement: MOESM3 [file 9444750]
